# Supplementary material
Source: Springer Nature journal article supplement (https://www.springermedizin.de/resource/supplementary/12985_2010_1079_MOESM4_ESM.pdf/9609094)

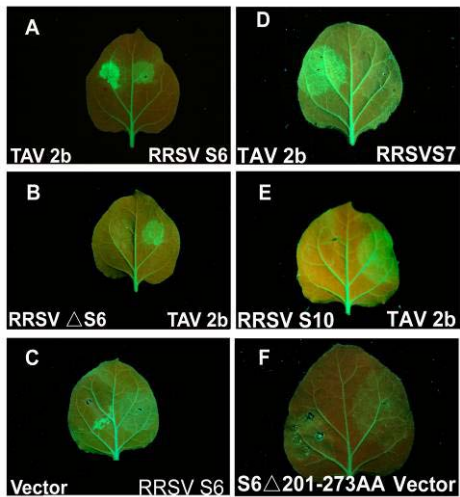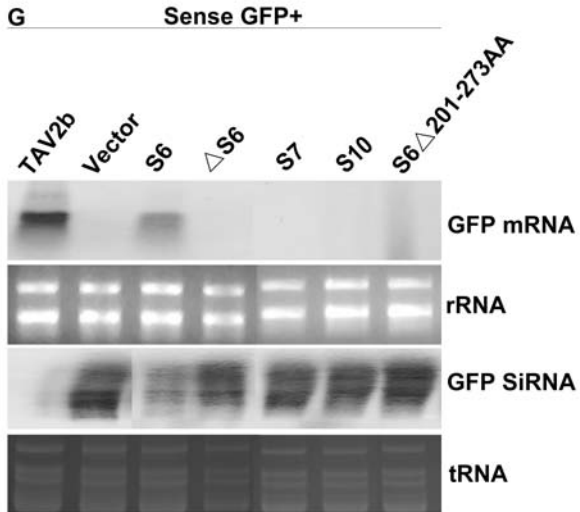

Supplement: MOESM4 [file 9609094]
